# Supplementary material for: The EMT transcription factor Snai1 maintains myocardial wall integrity by repressing intermediate filament gene expression
Source: eLife. 2021 Jun 21;10:e66143. doi: 10.7554/eLife.66143 (PMC8216718; doi:10.7554/eLife.66143)
Supplement: Supplementary file 2. [file elife-66143-supp2.xlsx]

## Sheet: Ct value
Supplemental Table 2: Ct values of genes by RT-qPCR
Figure 1 - figure supplement 1B
	Sample
Gene	snai1b+/+	snai1b-/-
snai1b	28.5	31.5
snai1a	25.8	26.1
rpl13a	17.9	18.1
Figure 3D
	Sample
Gene	snai1b+/+	snai1b-/-
desmb	29.7	28.6
rpl13a	24.1	24.5
Figure 3F
	Sample
Gene	myl7:GFP	snai1b OE
snai1b	31.3	25.6
desmb	29.7	28.8
rpl13a	25.3	23.9
Figure 3 - figure supplement 1C
	Sample
Gene	gfp	snai1b
snai1b	27.4	18.5
desmb	31.5	32.1
rpl13a	22.5	22.8

## Sheet: Figure 1 - figure supplement 1B
Figure 1 - figure supplement 1B
snai1b in snai1b-/- vs snai1b+/+				snai1a in snai1b-/- vs snai1b+/+
Table Analyzed	snai1b/snai1a			Table Analyzed	snai1b/snai1a
Column B	snai1b-/-			Column D	snai1b-/-
vs.	vs,			vs.	vs,
Column A	snai1b+/+			Column C	snai1b+/+
Unpaired t test				Unpaired t test
P value	<0,0001			P value	0.3953
P value summary	****			P value summary	ns
Significantly different (P < 0.05)?	Yes			Significantly different (P < 0.05)?	No
One- or two-tailed P value?	Two-tailed			One- or two-tailed P value?	Two-tailed
t, df	t=16,35, df=6			t, df	t=0,9153, df=6
How big is the difference?				How big is the difference?
Mean of column A	1.036			Mean of column C	0.9988
Mean of column B	0.09315			Mean of column D	0.9376
Difference between means (B - A) ± SEM	-0,9433 ± 0,05768			Difference between means (D - C) ± SEM	-0,06114 ± 0,06680
95% confidence interval	-1,084 to -0,8021			95% confidence interval	-0,2246 to 0,1023
R squared (eta squared)	0.9781			R squared (eta squared)	0.1225
F test to compare variances				F test to compare variances
F, DFn, Dfd	6,482, 3, 3			F, DFn, Dfd	1,724, 3, 3
P value	0.1591			P value	0.6656
P value summary	ns			P value summary	ns
Significantly different (P < 0.05)?	No			Significantly different (P < 0.05)?	No
Data analyzed				Data analyzed
Sample size, column A	4			Sample size, column C	4
Sample size, column B	4			Sample size, column D	4

## Sheet: Figure 3D
Figure 3D
desmb in snai1b-/- vs snai1b+/+
Table Analyzed	desmb
Column B	snai1b-/-
vs.	vs,
Column A	snai1b+/+
Unpaired t test
P value	0.0138
P value summary	*
Significantly different (P < 0.05)?	Yes
One- or two-tailed P value?	Two-tailed
t, df	t=3,441, df=6
How big is the difference?
Mean of column A	1.001
Mean of column B	2.568
Difference between means (B - A) ± SEM	1,567 ± 0,4555
95% confidence interval	0,4527 to 2,682
R squared (eta squared)	0.6637
F test to compare variances
F, DFn, Dfd	39177, 3, 3
P value	<0,0001
P value summary	****
Significantly different (P < 0.05)?	Yes
Data analyzed
Sample size, column A	4
Sample size, column B	4

## Sheet: Figure 3F
Figure 3F
snai1b in myl7:GFP vs snai1b OE				desmb in myl7:GFP vs snai1b OE
Table Analyzed	Data 1			Table Analyzed	Data 1
Column B	snai1b OE			Column D	snai1b OE
vs.	vs,			vs.	vs,
Column A	myl7:gfp Control			Column C	myl7:gfp Control
Unpaired t test				Unpaired t test
P value	0.0033			P value	0.0191
P value summary	**			P value summary	*
Significantly different (P < 0.05)?	Yes			Significantly different (P < 0.05)?	Yes
One- or two-tailed P value?	Two-tailed			One- or two-tailed P value?	Two-tailed
t, df	t=4,703, df=6			t, df	t=3,180, df=6
How big is the difference?				How big is the difference?
Mean of column A	1.002			Mean of column C	1.023
Mean of column B	21.87			Mean of column D	0.5529
Difference between means (B - A) ± SEM	20,87 ± 4,438			Difference between means (D - C) ± SEM	-0,4703 ± 0,1479
95% confidence interval	10,01 to 31,73			95% confidence interval	-0,8322 to -0,1084
R squared (eta squared)	0.7866			R squared (eta squared)	0.6275
F test to compare variances				F test to compare variances
F, DFn, Dfd	1112056, 3, 3			F, DFn, Dfd	258,7, 3, 3
P value	<0,0001			P value	0.0008
P value summary	****			P value summary	***
Significantly different (P < 0.05)?	Yes			Significantly different (P < 0.05)?	Yes
Data analyzed				Data analyzed
Sample size, column A	4			Sample size, column C	4
Sample size, column B	4			Sample size, column D	4

## Sheet: Figure 3 - figure supplement 1C
Figure 3 - figure supplement 1C
snai1b in gfp vs snai1b				desmb in gfp vs snai1b
Table Analyzed	snai1b mrna 4,5 hpf			Table Analyzed	snai1b mrna 4,5 hpf
Column B	snai1b mRNA			Column D	snai1b mRNA
vs.	vs,			vs.	vs,
Column A	gfp mRNA			Column C	gfp mRNA
Unpaired t test				Unpaired t test
P value	0.0591			P value	0.0544
P value summary	ns			P value summary	ns
Significantly different (P < 0.05)?	No			Significantly different (P < 0.05)?	No
One- or two-tailed P value?	Two-tailed			One- or two-tailed P value?	Two-tailed
t, df	t=2,324, df=6			t, df	t=2,384, df=6
How big is the difference?				How big is the difference?
Mean of column A	0.9999			Mean of column C	1.006
Mean of column B	801.7			Mean of column D	0.58
Difference between means (B - A) ± SEM	800,7 ± 344,5			Difference between means (D - C) ± SEM	-0,4263 ± 0,1788
95% confidence interval	-42,34 to 1644			95% confidence interval	-0,8638 to 0,01120
R squared (eta squared)	0.4737			R squared (eta squared)	0.4865
F test to compare variances				F test to compare variances
F, DFn, Dfd	2454005066, 3, 3			F, DFn, Dfd	2286, 3, 3
P value	<0,0001			P value	<0,0001
P value summary	****			P value summary	****
Significantly different (P < 0.05)?	Yes			Significantly different (P < 0.05)?	Yes
Data analyzed				Data analyzed
Sample size, column A	4			Sample size, column C	4
Sample size, column B	4			Sample size, column D	4
