# Supplementary material for: The EMT transcription factor Snai1 maintains myocardial wall integrity by repressing intermediate filament gene expression
Source: eLife. 2021 Jun 21;10:e66143. doi: 10.7554/eLife.66143 (PMC8216718; doi:10.7554/eLife.66143)
Supplement: Supplementary file 3. [file elife-66143-supp3.xlsx]

## Sheet: Figure 3 - figure supplement 1D
Supplemental Table 3: Luciferase assay raw values
Figure 3 - figure supplement 1D
Luciferase - raw
	800bp desmb			snai1b			800bp desmb + snai1b
1	301026	183422	153059	3607	3445	6103	102901	116345	161467
2	106792	165795	155777	3159	3778	3366	155628	192734	136561
3	89893	84935	106012	2860	2336	2198	157636	183792	182151
4	12995	22182	20715	2426	3109	2907	89079	120408	189406
Renilla - raw
	800bp desmb			snai1b			800bp desmb + snai1b
1	956071	604946	502422	463654	431552	770751	428129	457815	631266
2	285235	414814	403004	535414	634919	587890	515878	626948	459246
3	317225	279342	332714	380205	272770	229877	554603	628586	658367
4	39358	62785	61054	253245	384395	337025	324775	424833	636388
Luciferase/Renilla ratio
	800bp desmb			snai1b			800bp desmb + snai1b
1	0.314857	0.303204	0.304642	0.00777951	0.00798282	0.00791825	0.24035	0.254131	0.255783
2	0.3744	0.399685	0.38654	0.00590011	0.00595037	0.00572556	0.301676	0.307416	0.297359
3	0.283373	0.304054	0.318628	0.00752226	0.00856399	0.00956164	0.284232	0.29239	0.276671
4	0.330174	0.353301	0.33929	0.00957966	0.00808803	0.00862547	0.274279	0.283424	0.297627
Luciferase/Renilla ratio average
	800bp desmb			snai1b			800bp desmb + snai1b
1	0.307568			0.00789352			0.250088
2	0.386875			0.00585868			0.30215
3	0.302018			0.00854929			0.284431
4	0.340922			0.00876439			0.28511
Table Analyzed	Data 1						Number of families	1
Data sets analyzed	A-C						Number of comparisons per family	3
							Alpha	0.05
ANOVA summary
F	183.9						Tukey's multiple comparisons test	Mean Diff,	95,00% CI of diff,	Significant?	Summary	Adjusted P Value
P value	<0,0001						pGL4.14_-0.8desmb_luc vs. pGL4.14_luc + Snai1b	0.3266	0,2756 to 0,3776	Yes	****	<0,0001	A-B
P value summary	****						pGL4.14_-0.8desmb_luc vs. Column C	0.0539	0,002925 to 0,1049	Yes	*	0.0389	A-C
Significant diff. among means (P < 0.05)?	Yes						pGL4.14_luc + Snai1b vs. Column C	-0.2727	-0,3237 to -0,2217	Yes	****	<0,0001	B-C
R squared	0.9761
							Test details	Mean 1	Mean 2	Mean Diff,	SE of diff,	n1	n2	q	DF
Brown-Forsythe test							pGL4.14_-0.8desmb_luc vs. pGL4.14_luc + Snai1b	0.3343	0.007767	0.3266	0.01826	4	4	25.3	9
F (DFn, DFd)	3,248 (2, 9)						pGL4.14_-0.8desmb_luc vs. Column C	0.3343	0.2804	0.0539	0.01826	4	4	4.175	9
P value	0.0867						pGL4.14_luc + Snai1b vs. Column C	0.007767	0.2804	-0.2727	0.01826	4	4	21.12	9
P value summary	ns
Are SDs significantly different (P < 0.05)?	No
Bartlett's test
Bartlett's statistic (corrected)	14.24
P value	0.0008
P value summary	***
Are SDs significantly different (P < 0.05)?	Yes
ANOVA table	SS	DF	MS	F (DFn, DFd)	P value
Treatment (between columns)	0.2452	2	0.1226	F (2, 9) = 183,9	P<0,0001
Residual (within columns)	0.006	9	0.0006667
Total	0.2512	11
Data summary
Number of treatments (columns)	3
Number of values (total)	12
